# Supplementary material
Source: publisher figshare collection journal article supplement (https://tandf.figshare.com/ndownloader/files/13359899)
Supplement: Supplementary file 1 [file 13359899]

| Supplementary Table 1.: Details of each ECTseries. | | | | | | | | | | |
| --- | --- | --- | --- | --- | --- | --- | --- | --- | --- | --- |
| **Patient** | **County** | **Treatment start** | **Number of ECT sessions** | **Electrode placement** | **Charge (mC)** | **Current (mA)** | **Duration (ms)** | **Frequency (Hz)** | **Pulse Width (ms)** | **Seizure time (s)** |
| 1 | 1 | 2012 | 5 | Unilateral | 301 | 900 | 67 | 50 | 50 | 59 |
| 2 | 1 | 2013 | 1 | Unilateral | 126 | 900 | 70 | 20 | 50 | 148 |
| 3 | 1 | 2014 | 6 | Unilateral | 256 | 800 | 80 | 40 | 50 | 28 |
| 4 | 1 | 2015 | 4 | Unilateral | 378 | 900 | 60 | 70 | 50 | 62 |
| 5 | 1 | 2013 | 6 | Unilateral | 384 | 800 | 80 | 60 | 50 | 37 |
| 6 | 1 | 2017 | 6 | Unilateral | 329 | 900 | 73 | 50 | 50 | 56 |
| 7 | 1 | 2015 | 6 | Unilateral | 360 | 900 | 80 | 50 | 50 | 22 |
| 8 | 1 | 2012 | 13 | Unilateral | 425 | 890 | 79 | 60 | 50 | 22 |
| 9 | 1 | 2012 | 6 | Unilateral | 449 | 890 | 72 | 70 | 50 | 25 |
| 10 | 1 | 2014 | 10 | Unilateral | 604 | 900 | 80 | 70 | 60 | 58 |
| 11 | 1 | 2016 | 9 | Unilateral | 192 | 800 | 60 | 40 | 50 | 63 |
| 12 | 1 | 2012 | 6 | Unilateral | 646 | 890 | 69 | 70 | 75 | 32 |
| 13 | 1 | 2013 | 3 | Unilateral | 199 | 890 | 75 | 30 | 50 | 26 |
| 14 | 1 | 2013 | 6 | Unilateral | 384 | 800 | 80 | 60 | 50 | 47 |
| 15 | 1 | 2013 | 6 | Unilateral | 124 | 890 | 70 | 20 | 50 | 23 |
| 16 | 1 | 2013 | 4 | Unilateral | 512 | 800 | 80 | 80 | 50 | 42 |
| 17 | 1 | 2015 | 6 | Unilateral | 306 | 910 | 67 | 50 | 50 | 54 |
| 18 | 3 | 2012 | 10 | Unilateral |  |  |  |  |  |  |
| 19 | 3 | 2014 | 6 | Unilateral | 258 | 920 | 70 | 40 | 50 | 49 |
| 20 | 6 | 2013 | 9 | Unilateral | 124 | 880 | 70 | 20 | 50 | 46 |
| 21 | 6 | 2013 | 13 | Unilateral | 281 | 910 | 77 | 40 | 50 | 49 |
| 22 | 9 | 2015 | 3 | Bitemporal | 320 | 800 | 80 | 50 | 50 | 24 |
| 23 | 13 | 2015 | 12 | Unilateral | 386 | 800 | 60 | 80 | 50 | 35 |
| 24 | 14 | 2016 | 12 | Unilateral | 113 | 700 | 32 | 50 | 50 | 70 |
| 25 | 14 | 2015 | 6 | Unilateral | 288 | 800 | 60 | 60 | 50 | 27 |
| 26 | 18 | 2011 | 5 | Unilateral | 324 | 800 | 45 | 90 | 50 | 113 |
| 27 | 20 | 2016 | 10 | Unilateral | 448 | 800 | 80 | 70 | 50 | 24 |
| 28 | 21 | 2016 | 6 | Unilateral | 256 | 800 | 80 | 40 | 50 | 33 |
| 29 | 21 | 2017 | 6 | Unilateral | 384 | 800 | 80 | 60 | 50 | 56 |
| 30 | 22 | 2012 | 15 | Unilateral | 436 | 800 | 65 | 70 | 50 | 50 |
| 31 | 24 | 2013 | 5 | Bifrontal | 192 | 860 | 75 | 30 | 50 | 59 |
| 32 | 24 | 2015 | 10 | Unilateral | 192 | 800 | 40 | 50 | 60 | 57 |
| 33 | 25 | 2017 | 6 | Unilateral | 288 | 800 | 75 | 40 | 60 | 62 |
| County = location code of treatment | | | | | | | | | | |
